# Supplementary material for: Identification of STAB1 in Multiple Datasets as a Prognostic Factor for Cytogenetically Normal AML: Mechanism and Drug Indications
Source: PubMed Central journal article supplement — Mol Ther Nucleic Acids. 2019 Sep 23;18:476–84. doi: 10.1016/j.omtn.2019.09.014 (PMC6831857; doi:10.1016/j.omtn.2019.09.014), 2019-09-23
Supplement: mmc1.pdf [file mmc1.pdf]

OMTN, Volume 18

## Supplemental Information

### Identification of *STAB1* in Multiple Datasets as a Prognostic Factor for Cytogenetically Normal AML: Mechanism and Drug Indications

Sheng-Yan Lin, Fei-Fei Hu, Ya-Ru Miao, Hui Hu, Qian Lei, Qiong Zhang, Qiubai Li, Hongxiang Wang, Zhichao Chen, and An-Yuan Guo

## **Supporting information**

Figure S1. Overall survival (OS) analysis of differentially expressed genes associated with OS screened from TCGA cohort in four independent CN-AML datasets, and A, B, C and D referred to GSE311602 (n=79), GSE71014 (n=104), GSE12417 (n=163) and GSE6891 (n=187), respectively.

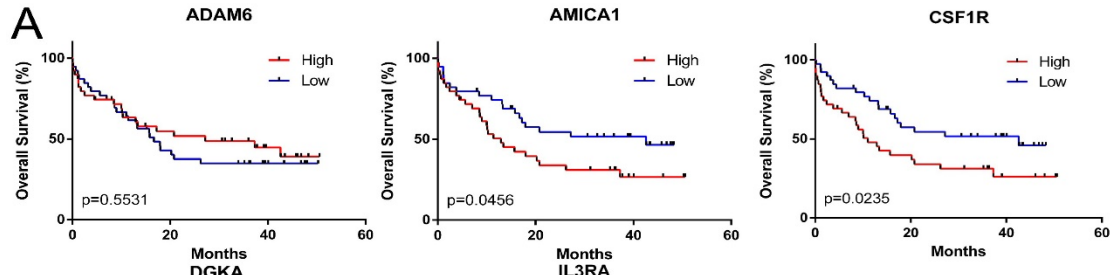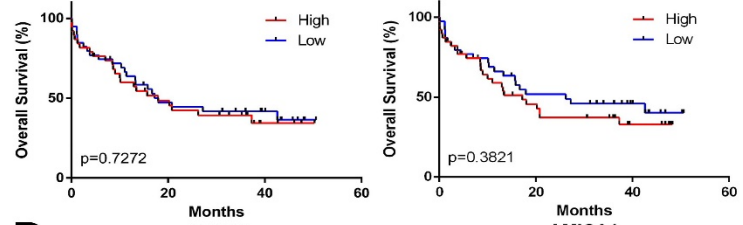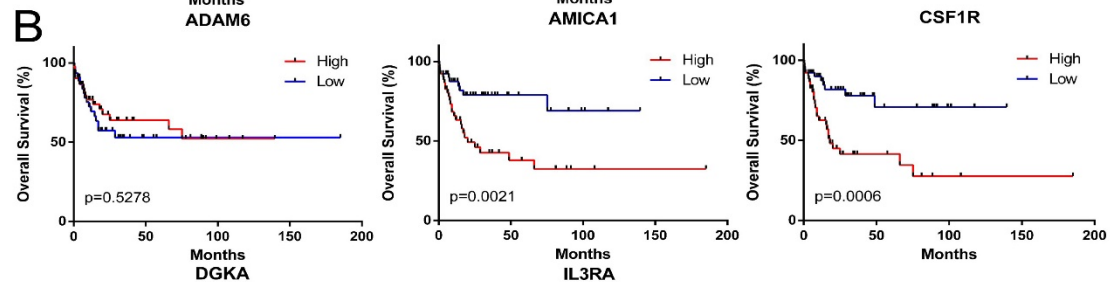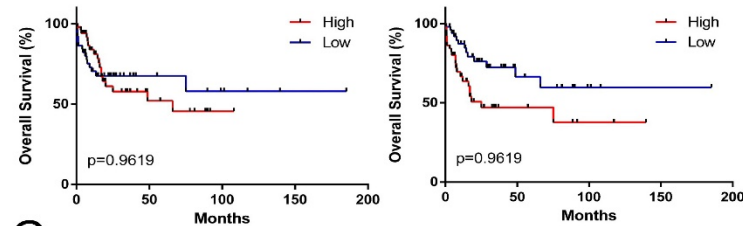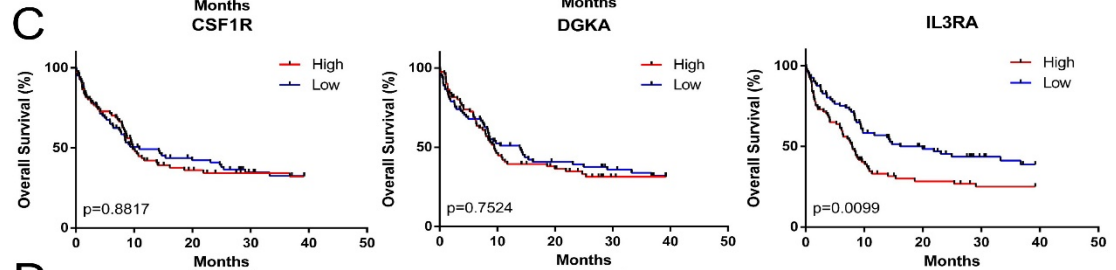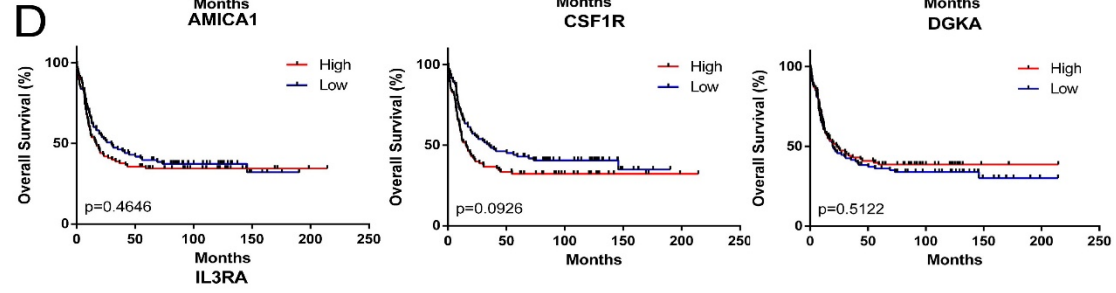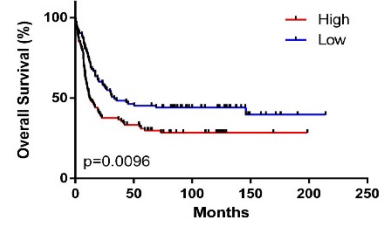

Figure S2. Cell apoptosis of KG1a cells transfected with NC or si-STAB1 for 48h and tested by FACS analysis.

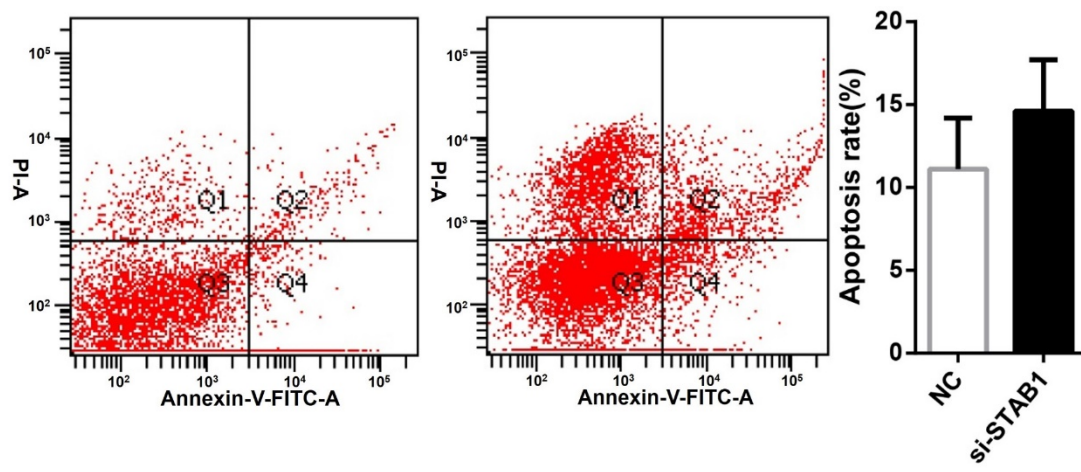

Table S1. Univariate analysis of clinical factors in the cohort of 79 CN-AML patients

| Clinical Factor | group              | beta      | HR (95% CI for HR) | p-value  |
|-----------------|--------------------|-----------|--------------------|----------|
| Sex.            | Sex.M              | -0.31     | 0.74 (0.45-1.2)    | 0.23     |
| Age.            | Age.over 60        | 0.75      | 2.1 (1.3-3.5)      | 0.0032   |
| WBC.            | WBC.over 70        | 0.24      | 1.3 (0.74-2.2)     | 0.38     |
| MLL_PTD.        | MLL_PTD.positive.f | -0.48     | 0.62 (0.29-1.3)    | 0.21     |
| FLT3.           | FLT3.positive.m    | 0.46      | 1.6 (0.95-2.6)     | 0.078    |
| NPM1.           | NPM1.positive.m    | -0.15     | 0.86 (0.52-1.4)    | 0.54     |
| DNMT3A.         | DNMT3A.positive.m  | 0.44      | 1.6 (0.93-2.6)     | 0.093    |
| IDH2.           | IDH2.positive.m    | 0.39      | 1.5 (0.74-2.9)     | 0.27     |
| IDH1.           | IDH1.positive.m    | -1.2      | 0.31 (0.11-0.87)   | 0.026    |
| RUNX1.          | RUNX1.positive.m   | 0.58      | 1.8 (0.9-3.6)      | 0.097    |
| TET2.           | TET2.positive.m    | -0.45     | 0.64 (0.3-1.3)     | 0.23     |
| NRAS.           | NRAS.positive.m    | -0.9      | 0.41 (0.13-1.3)    | 0.13     |
| CEBPA.          | CEBPA.positive.m   | -0.14     | 0.87 (0.37-2)      | 0.74     |
| WT1.            | WT1.positive.m     | 0.1       | 1.1 (0.44-2.8)     | 0.83     |
| PTPN11.         | PTPN11.positive.m  | 0.21      | 1.2 (0.49-3.1)     | 0.66     |
| SMC1A.          | SMC1A.positive.m   | 0.7       | 2 (0.73-5.6)       | 0.18     |
| SMC3.           | SMC3.positive.m    | 0.74      | 2.1 (0.75-5.8)     | 0.16     |
| STAG2.          | STAG2.positive.m   | -0.16     | 0.86 (0.31-2.4)    | 0.76     |
| MT_CYB.         | MT_CYB.positive.m  | 1.4       | 4.1 (1.2-14)       | 0.022    |
| PHF6.           | PHF6.positive.m    | 0.18      | 1.2 (0.37-3.8)     | 0.77     |
| FAB.            |                    |           |                    | 0.5413   |
| FAB.M1          | FAB.M1             | -0.843525 | 0.43 (0.14-1.3)    | 0.140695 |
| FAB.M2          | FAB.M2             | -0.610884 | 0.54 (0.18-1.7)    | 0.284304 |
| FAB.M3          | FAB.M3             | NA        | NA (NA-NA)         | NA       |
| FAB.M4          | FAB.M4             | -0.250967 | 0.78 (0.26-2.3)    | 0.654013 |
| FAB.M5          | FAB.M5             | -0.802819 | 0.45 (0.13-1.6)    | 0.211716 |
| FAB.M6          | FAB.M6             | NA        | NA (NA-NA)         | NA       |
| FAB.M7          | FAB.M7             | 0.4083068 | 1.5 (0.17-14)      | 0.716368 |
| FAB.nc          | FAB.nc             | -16.68037 | 5.7e-08 (0-Inf)    | 0.995119 |

Table S2. Multivariable analysis of ADAM6, AMICA1, CSF1R, DGKA, IL3RA and clinical variables in TCGA cohort.

| Overall Survival Covariate | HR (95% CI)       | p-value |
|----------------------------|-------------------|---------|
| <b>AMICA1</b>              | 2.02 (1.02-3.02)  | 0.0437  |
| Age                        | 2.47 (1.16-3.70)  | 0.0132  |
| DNMT3A                     | 1.58 (0.89-2.95)  | 0.1151  |
| RUNX1                      | 1.93 (0.98-3.26)  | 0.0541  |
| FLT3-ITD                   | -1.52 (0.14-1.28) | 0.1277  |
| MT-CYB                     | 1.79 (0.93-4.77)  | 0.0731  |
| WT1                        | 1.55 (0.77-10.11) | 0.1203  |
| IDH2                       | 0.07 (0.47-2.26)  | 0.9475  |
| NPM1                       | 0.71 (0.52-3.99)  | 0.4757  |
| IDH1                       | -0.28 (0.49-1.70) | 0.7776  |
| <b>ADAM6</b>               | -2.14 (1.01-3.03) | 0.0325  |
| Age                        | 2.69 (1.24-3.95)  | 0.0007  |
| DNMT3A                     | 2.59 (1.20-3.86)  | 0.0097  |
| RUNX1                      | 2.08 (1.05-5.62)  | 0.0378  |
| FLT3-ITD                   | 0.60 (0.63-2.38)  | 0.5506  |
| MT-CYB                     | 1.63 (0.80-10.74) | 0.1038  |
| WT1                        | 0.72 (0.54-3.82)  | 0.4693  |
| IDH2                       | 0.09 (0.47-2.28)  | 0.093   |
| NPM1                       | 0.16 (0.56-1.96)  | 0.8766  |
| IDH1                       | -1.45 (0.15-1.33) | 0.1462  |
| <b>CSF1R</b>               | 1.97 (1.00-2.88)  | 0.0489  |
| Age                        | 2.50 (1.17-3.71)  | 0.0124  |
| DNMT3A                     | 2.31 (1.11-3.53)  | 0.021   |
| RUNX1                      | 1.66 (0.88-4.59)  | 0.0973  |
| FLT3-ITD                   | 1.81 (0.96-3.25)  | 0.0697  |
| MT-CYB                     | 1.15 (0.58-8.11)  | 0.2484  |
| WT1                        | 0.72 (0.53-3.95)  | 0.4718  |
| IDH2                       | 0.60 (0.58-2.75)  | 0.5494  |
| NPM1                       | 0.19 (0.57-1.98)  | 0.849   |
| IDH1                       | -1.40 (0.15-1.38) | 0.1624  |
| <b>DGKA</b>                | 2.48 (1.16-3.49)  | 0.0131  |
| Age                        | 2.30 (1.10-3.42)  | 0.0212  |
| DNMT3A                     | 2.75 (1.28-4.30)  | 0.0059  |
| RUNX1                      | 1.90 (0.98-5.05)  | 0.0574  |
| FLT3-ITD                   | 1.60 (0.89-3.11)  | 0.1103  |
| MT-CYB                     | 1.06 (0.55-7.45)  | 0.2905  |
| WT1                        | 0.60 (0.50-3.70)  | 0.5467  |
| IDH2                       | 0.53 (0.57-2.67)  | 0.5947  |
| NPM1                       | 0.28 (0.58-2.07)  | 0.7764  |
| IDH1                       | -1.45 (0.14-1.33) | 0.147   |

|              |                   |        |
|--------------|-------------------|--------|
| <b>IL3RA</b> | 2.84 (1.29-3.99)  | 0.0045 |
| Age          | 2.82 (1.29-4.15)  | 0.0048 |
| DNMT3A       | 2.35 (1.12-3.64)  | 0.019  |
| RUNX1        | 1.34 (0.77-3.99)  | 0.1787 |
| FLT3-ITD     | 1.22 (0.79-2.71)  | 0.2208 |
| MT-CYB       | 1.32 (0.66-8.57)  | 0.1858 |
| WT1          | 0.33 (0.44-3.19)  | 0.7398 |
| IDH2         | -0.15 (0.43-2.07) | 0.8817 |
| NPM1         | 0.30 (0.58-2.09)  | 0.7615 |
| IDH1         | -1.74 (0.12-1.14) | 0.082  |

The model was generated from a COX regression model that included Age, gene mutation of DNMT3A, and RUNX1, FLT3-ITD, MT-CYB, WT1, IDH2, NPM1, IDH1 and expression level of STAB1.

HR: Hazard Ratio

N/A: Not available

Table S3. Clinical characteristics in TCGA cohort between *STAB1*<sup>high</sup> and *STAB1*<sup>low</sup> group.

| Clinical Factor | <i>STAB1</i> <sup>low</sup> group (n=40) | <i>STAB1</i> <sup>high</sup> group (n=39) | p-value |
|-----------------|------------------------------------------|-------------------------------------------|---------|
| Female          | 20                                       | 20                                        | 1       |
| Male            | 20                                       | 19                                        |         |
| WBC High(>70)   | 10                                       | 14                                        | 0.3348  |
| WBC Low(≤70)    | 30                                       | 25                                        |         |
| Age ( ≥60 )     | 16                                       | 20                                        | 0.3699  |
| Age ( < 60 )    | 24                                       | 19                                        |         |
| OS ( ≥2year )   | 21                                       | 11                                        | 0.0392  |
| OS ( < 2year )  | 19                                       | 28                                        |         |
| EFS ( ≥1year )  | 20                                       | 25                                        | 0.258   |
| EFS ( < 1year ) | 20                                       | 14                                        |         |
| EFS ( ≥2year )  | 12                                       | 7                                         | 0.2933  |
| EFS ( < 2year ) | 28                                       | 32                                        |         |
| FLT3-           | 28                                       | 21                                        | 0.1681  |
| FLT3+           | 12                                       | 18                                        |         |
| NPM1-           | 23                                       | 16                                        | 0.1793  |
| NPM1+           | 17                                       | 23                                        |         |
| DNMT3A-         | 29                                       | 31                                        | 0.3746  |
| DNMT3A+         | 11                                       | 18                                        |         |
| IDH2-           | 34                                       | 35                                        | 0.737   |
| IDH2+           | 6                                        | 4                                         |         |
| IDH1-           | 35                                       | 35                                        | 1       |
| IDH1+           | 5                                        | 4                                         |         |
| RUNX1-          | 32                                       | 37                                        | 0.0872  |
| RUNX1+          | 8                                        | 2                                         |         |
| TET2-           | 32                                       | 36                                        | 0.1927  |
| TET2+           | 8                                        | 3                                         |         |
| TP53-           | 39                                       | 39                                        | 1       |
| TP53+           | 1                                        | 0                                         |         |
| NRAS-           | 36                                       | 37                                        | 0.6752  |
| NRAS+           | 4                                        | 2                                         |         |
| CEBPA-          | 34                                       | 37                                        | 0.2633  |
| CEBPA+          | 6                                        | 2                                         |         |



|         |    |    |        |
|---------|----|----|--------|
| WT1-    | 35 | 38 | 0.2007 |
| WT1+    | 5  | 1  |        |
| PTPN11- | 38 | 36 | 0.6752 |
| PTPN11+ | 2  | 3  |        |
| KIT-    | 40 | 40 | 1      |
| KIT+    | 0  | 0  |        |
| KRAS-   | 38 | 39 | 1      |
| KRAS+   | 2  | 0  |        |
| MT-CO2- | 38 | 39 | 1      |
| MT-CO2+ | 2  | 0  |        |
| TTN-    | 37 | 36 | 1      |
| TTN+    | 3  | 3  |        |
| U2AF1-  | 40 | 38 | 0.4937 |
| U2AF1+  | 0  | 1  |        |
| SMC1A-  | 39 | 36 | 0.3589 |
| SMC1A+  | 1  | 3  |        |
| SMC3-   | 38 | 37 | 1      |
| SMC3+   | 2  | 2  |        |
| STAG2-  | 37 | 37 | 1      |
| STAG2+  | 3  | 2  |        |
| MTCYB-  | 40 | 36 | 0.1156 |
| MTCYB+  | 0  | 3  |        |
| PHF6-   | 37 | 39 | 0.2405 |
| PHF6+   | 3  | 0  |        |
| ASXL1-  | 39 | 39 | 1      |
| ASXL1+  | 1  | 0  |        |
| FAB     |    |    | 0.0326 |
| M0      | 3  | 1  | 0.3171 |
|         | 37 | 38 |        |
| M1      | 15 | 8  | 0.0966 |
|         | 25 | 31 |        |
| M2      | 11 | 9  | 0.6513 |
|         | 29 | 30 |        |
| M4      | 8  | 11 | 0.3936 |
|         | 32 | 28 |        |
| M5      | 1  | 10 | 0.003  |
|         | 39 | 29 |        |
| M6      | 0  | 0  |        |
|         | 40 | 39 | 1      |
| M7      | 1  | 0  | 1      |
|         | 39 | 39 |        |

---

Table S4. Clinical characteristics in GSE6891 dataset between *STAB1*<sup>high</sup> and *STAB1*<sup>low</sup> group.

| Clinical Factor | <i>STAB1</i> <sup>low</sup> group<br>(n=93) | <i>STAB1</i> <sup>high</sup> group<br>(n=93) | p-value |
|-----------------|---------------------------------------------|----------------------------------------------|---------|
| Female          | 38                                          | 54                                           | 0.0276  |
| Male            | 55                                          | 39                                           |         |
| Age ( ≥50 )     | 41                                          | 37                                           | 0.6559  |
| Age ( < 50 )    | 52                                          | 56                                           |         |
| OS ( ≥3year )   | 45                                          | 35                                           | 0.1824  |
| OS ( < 3year )  | 48                                          | 58                                           |         |
| EFS ( ≥1year )  | 53                                          | 37                                           | 0.0275  |
| EFS ( < 1year ) | 40                                          | 56                                           |         |
| FLT3-ITD-       | 62                                          | 46                                           | 0.0255  |
| FLT3-ITD+       | 31                                          | 47                                           |         |
| FLT3-TKD-       | 86                                          | 83                                           | 0.2379  |
| FLT3-TKD+       | 7                                           | 13                                           |         |
| NPM1-           | 53                                          | 28                                           | 0.0004  |
| NPM1+           | 40                                          | 65                                           |         |
| NRAS-           | 85                                          | 86                                           | 1       |
| NRAS+           | 7                                           | 7                                            |         |
| KRAS-           | 93                                          | 92                                           | 1       |
| KRAS+           | 0                                           | 1                                            |         |
| EVI1-           | 90                                          | 90                                           | 1       |
| EVI1+           | 3                                           | 3                                            |         |
| CEBPA-          | 74                                          | 91                                           | <0.0001 |
| CEBPA+          | 19                                          | 2                                            |         |
| IDH2-           | 82                                          | 87                                           | 0.3089  |
| IDH2+           | 11                                          | 6                                            |         |
| FAB             |                                             |                                              | <0.0001 |
| AML-M0          | 2                                           | 1                                            | 0.5671  |
| No AML-M0       | 85                                          | 85                                           |         |
| AML-M1          | 41                                          | 11                                           | <0.0001 |
| No AML-M1       | 46                                          | 75                                           |         |
| AML-M2          | 24                                          | 11                                           | 0.0154  |
| No AML-M2       | 63                                          | 75                                           |         |
| AML-M4          | 6                                           | 22                                           | 0.0008  |
| No AML-M4       | 81                                          | 64                                           |         |
| AML-M5          | 11                                          | 41                                           | <0.0001 |

|           |    |    |        |
|-----------|----|----|--------|
| No AML-M5 | 76 | 45 |        |
| AML-M6    | 3  | 0  | 0.0824 |
| No AML-M6 | 84 | 86 |        |

---
